# Supplementary material
Source: PubMed Central journal article supplement (PMC2874440)
Supplement: supp_42_5_537__1.pdf [file supp_42_5_537__1.pdf]

**ONLINE DATA SUPPLEMENT**

**Role of the Serotonergic System in Reduced Pulmonary Function Following Exposure to  
Methamphetamine**

Sandra M. Wells, Mary C. Buford, Virginia M. Porter, Heather L. Brunell, Melisa Bunderson-  
Schelvan, Andrew B. Nevin, Fernando Cardozo-Pelaez, Andrij Holian

## Supplemental Figure 1

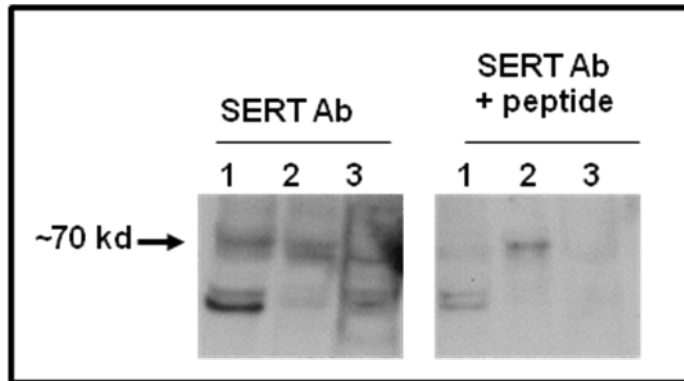

**Supplemental Figure 1: SERT expression in mouse brain homogenates and mouse lung epithelial cells.** Immunoblotting with and without blocking peptide was used to determine whether the SERT bands in tissues and cells were specific. Lane 1 contains mouse brain homogenate, Lane 2 contains mouse lung homogenate, and Lane 3 contains lysate from LA-4 cells. Blocking peptide significantly blocked the SERT antibody binding in mouse brain homogenate and LA-4 cell lysate.
